# Supplementary material for: Sensitivity, specificity, and reproducibility of RNA-Seq differential expression calls
Source: PubMed Central journal article supplement (PMC5168849; doi:10.1186/s13062-016-0169-7), 2016-12-20
Supplement: 13062_2016_169_MOESM1_ESM.pdf [file 13062_2016_169_MOESM1_ESM.pdf]

## Supplementary Figure

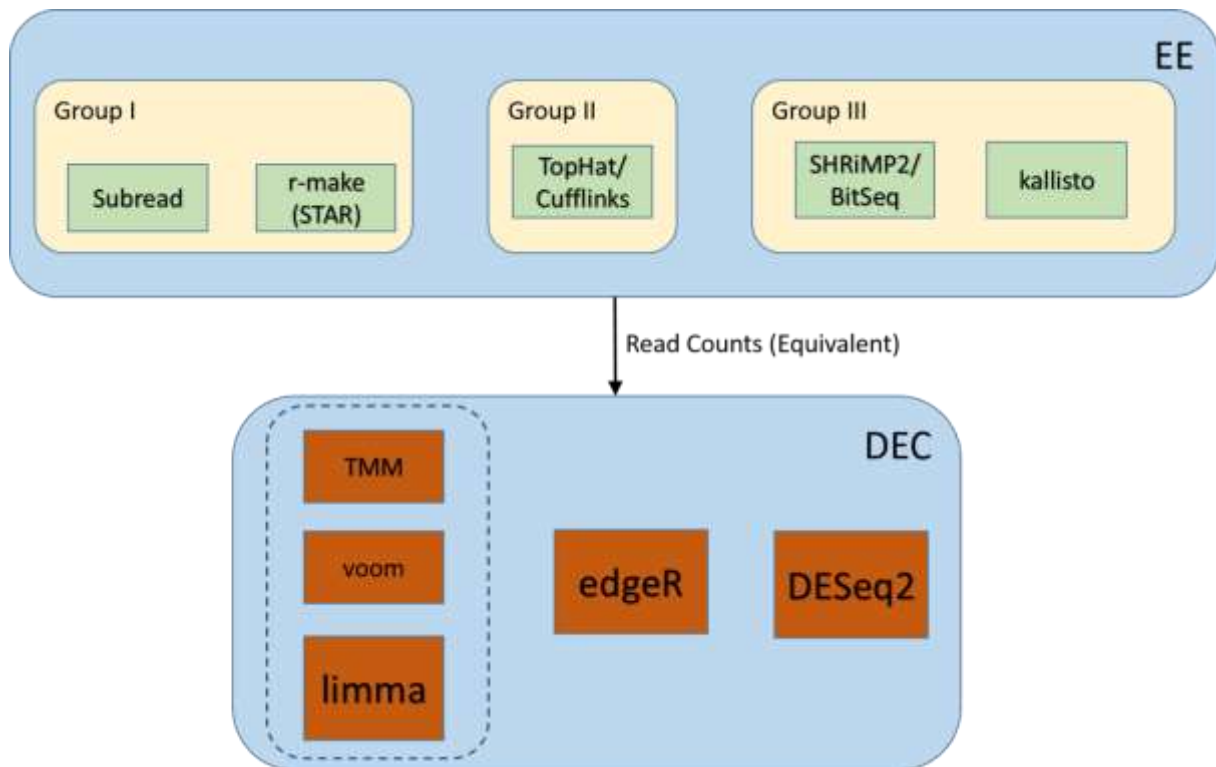

Figure S1. Schema presenting the groups represented by the examined tools.

The examined tools estimating the expression (EE) can be seen as representatives of three groups.

- I) Tools which perform an alignment of the sequenced reads to the genome, followed by counting reads that fall into the known gene regions.
- II) Tools from a hybrid approach, where based on the provided gene model the virtual transcriptome is constructed and reads are first aligned to it. In the next steps these aligned reads are mapped back to the genome and the remaining not aligned yet reads are aligned to the genome sequences (TopHat). Gene and transcript expression levels are then estimated using the tool that processes the genome-based alignments (Cufflinks).
- III) Tools which perform (pseudo) alignment of the sequenced reads to the alternative transcript sequences and then assess the alternative transcripts abundances. The gene level abundances are obtained by summing the ones from the alternative transcripts.

Read counts or read count equivalents provided by the EE tools are then fed to differential expression calling (DEC) tools. Here three popular alternatives have been examined: limma (together with TMM and voom), edgeR, and DESeq2.

# Supplementary R code

## Factor analysis by SVA

```
samples.fc <- c()
for(x in colnames(data.in))
{
  sampl <- substr(x, 5,5)
  samples.fc <- c(samples.fc, sampl)
}
group = as.factor(samples.fc)
mod1 = model.matrix(~group)
res <- svaseq(data.in, mod=mod1, constant=0.5, B=5, n.sv=4)
new.dat <- fsva(log(data.in+0.5), mod1, res, newdat=data.in, method="exact")
data.out <- exp(new.dat$db)-0.5
```

## Differential expression analysis

```
DEfun <- function(counts, design)
{
  DE <- list()

## limma
gene.dge <- DGEList(counts=counts, group=factor(rep(1:2, each=4)))
gene.dge.norm <- calcNormFactors(gene.dge)

gene.dge.norm2 <- gene.dge.norm
gene.dge.norm2$counts <- gene.dge.norm2$counts-0.5
rpm <- voom(gene.dge.norm2, design)

cm <- makeContrasts(AvsC=As-Cs,
                    levels=design)
fit <- lmFit(rpm, design)
cf <- contrasts.fit(fit, cm)
fit.eB <- eBayes(cf, proportion=0.3, robust=TRUE)
adjust.meth <- "BH"
tt.limma <- topTable(fit.eB, adjust.method=adjust.meth, number=Inf)
FC <- tt.limma$logFC
AE <- tt.limma$AveExpr
qval <- tt.limma$adj.P.Val
names(FC) <- names(AE) <- names(qval) <- rownames(tt.limma)
DE.list <- DElist(FC, AE, qval, 0.05)
DE[["limma"]] <- list(DE.list=DE.list)

## edgeR
y <- estimateCommonDisp(gene.dge.norm)
y <- estimateTagwiseDisp(y)
et <- exactTest(y)
tt.edgeR <- topTags(et, n=Inf, adjust.method=adjust.meth)
FC <- tt.edgeR$table$logFC
AE <- tt.edgeR$table$logCPM
qval <- tt.edgeR$table$FDR
names(FC) <- names(AE) <- names(qval) <- rownames(tt.edgeR$table)
DE.list <- DElist(FC, AE, qval, 0.05)
## DE[["edgeR"]] <- list(fit=et, tt=tt.edgeR$table, DE.list=DE.list)
DE[["edgeR"]] <- list(DE.list=DE.list)

## DESeq2
colData <- data.frame(condition=rep(c("A","C"), each=4), type="paired-end")
rownames(colData) <- colnames(counts)

dds <- DESeqDataSetFromMatrix(countData = round(counts),
                              colData = colData,
                              design = ~condition)
```

```
dds <- DESeq(dds)
tt.DESeq2 <- DESeq2::results(dds, contrast=c("condition","A","C"),
pAdjustMethod = "BH",)
FC <-tt.DESeq2$log2FoldChange
FC[is.na(FC)] <- 0
AE <-log2(tt.DESeq2$baseMean+0.5)
qval <- tt.DESeq2$padj
qval[is.na(qval)] <- 1
names(FC) <- names(AE) <- names(qval) <- rownames(tt.DESeq2)
DE.list <- DElist(FC, AE, qval, 0.05)
DE[["DESeq2"]] <- list(DE.list=DE.list)

return(DE)
}
```
